# Supplementary material for: Lanthanide salen-type complexes exhibiting single ion magnet and photoluminescent properties
Source: Royal Society of Chemistry journal article supplement (doi:10.1039/c5dt03897a), 2016-01-01
Supplement: c5dt03897a1.pdf [file c5dt03897a1.pdf]

## **Electronic Supplementary Information**

### **Lanthanide salen-type complexes exhibiting single ion magnet and photoluminescent properties**

Min Ren, Zhong-Li Xu, Song-Song Bao, Ting-Ting Wang, Ze-Hua Zheng, Rute A. S. Ferreira, Li-Min Zheng\* and Luis D. Carlos\*

### The ac magnetic susceptibilities fitting

The ac magnetic susceptibilities can be well fitted using the generalized Debye model in Eq(S1), Eq(S2)<sup>1</sup>:

$$\chi'(\omega) = \chi_s + \frac{(\chi_T - \chi_s) \left[ 1 + (\omega\tau)^{1-\alpha} \sin(\pi\alpha / 2) \right]}{1 + 2(\omega\tau)^{1-\alpha} \sin(\pi\alpha / 2) + (\omega\tau)^{2(1-\alpha)}} \quad (\text{S1})$$

$$\chi''(\omega) = \frac{(\chi_T - \chi_s) \left[ (\omega\tau)^{1-\alpha} \cos(\pi\alpha / 2) \right]}{1 + 2(\omega\tau)^{1-\alpha} \sin(\pi\alpha / 2) + (\omega\tau)^{2(1-\alpha)}} \quad (\text{S2})$$

where  $\chi_s$  is the adiabatic susceptibility,  $\chi_T$  is the isothermal susceptibility, and  $\tau$  is the average relaxation time of magnetization, and the  $\alpha$  parameter, which ranges between 0 and 1, quantifies the width of the  $\tau$  distribution.

### Calculation of the $^5\text{D}_0$ radiative ( $A_r$ ) and nonradiative ( $A_{nr}$ ) transition probabilities and quantum efficiency ( $\eta$ )

Based on the emission spectra, the  $^5\text{D}_0$   $A_r$  and  $A_{nr}$  transition probabilities and the quantum efficiency ( $\eta$ )<sup>2-5</sup> was determined for **1** at 300 K. Assuming that only non-radiative and radiative processes are involved in the depopulation of the  $^5\text{D}_0$  state,  $\eta$  is given by:

$$\eta = \frac{A_r}{A_r + A_{nr}} \quad (\text{S3})$$

The radiative contribution is calculated from the relative intensities of the  $^5\text{D}_0 \rightarrow ^7\text{F}_{0-6}$  transitions. The emission intensity,  $I$ , taken as the integrated intensity  $S$  of the emission lines for the  $^5\text{D}_0 \rightarrow ^7\text{F}_{0-6}$  transitions, is given by:

$$I_{i \rightarrow j} = \hbar\omega_{i \rightarrow j} A_{i \rightarrow j} N_i \equiv S_{i \rightarrow j} \quad (\text{S4})$$

where  $i$  and  $j$  represent the initial ( $^5\text{D}_0$ ) and final ( $^7\text{F}_{0-6}$ ) levels, respectively,  $\hbar\omega_{i \rightarrow j}$  is the transition energy,  $A_{i \rightarrow j}$  the Einstein coefficient of spontaneous emission and  $N_i$  the population of the  $^5\text{D}_0$  emitting level.<sup>3-5</sup> Because the  $^5\text{D}_0 \rightarrow ^7\text{F}_{5,6}$  transitions are not observed experimentally, their influence on the depopulation of the  $^5\text{D}_0$  excited state may be neglected and, thus, the radiative contribution is estimated based only on the relative intensities of the  $^5\text{D}_0 \rightarrow ^7\text{F}_{0-4}$  transitions. The emission integrated intensity,  $S$ , of the  $^5\text{D}_0 \rightarrow ^7\text{F}_{0-4}$  transitions has been measured for compounds **1** at 300 K.

Because the  $^5\text{D}_0 \rightarrow ^7\text{F}_1$  transition does not depend on the local ligand field (due to its

dipolar magnetic nature) it may be used as a reference for the whole spectrum, *in vacuo*  $A(^5D_0 \rightarrow ^7F_1) = 14.65 \text{ s}^{-1}$ ,<sup>6</sup> and  $A_r$  is given by:

$$k_r = A_{0 \rightarrow 1} \frac{\hbar \omega_{0 \rightarrow 1}}{S_{0 \rightarrow 1}} \sum_{J=0}^4 \frac{S_{0-J}}{\hbar \omega_{0-J}} \quad (\text{S5})$$

where  $A_{0-J}$  is the Einstein coefficient of spontaneous emission between the  $^5D_0$  and the  $^7F_1$  levels. An average index of refraction of 1.5 was considered for **1**, leading to  $A(^5D_0 \rightarrow ^7F_1) \approx 50 \text{ s}^{-1}$ .<sup>7</sup>

## REFERENCES

1. (a) D. Gatteschi, R. Sessoli and J. Villain, *Molecular Nanomagnets*, Oxford University, New York, 2006. (b) Y.-N. Guo, G.-F. Xu, P. Gamez, L. Zhao, S.-Y. Lin, R. Deng, J. Tang and H.-J. Zhang, *J. Am. Chem. Soc.*, 2010, 132, 8538-8539.
2. M. H. V. Werts, R. T. F. Jukes, J. W. Verhoeven, *Phys. Chem. Chem. Phys.*, 2002, 4, 1542-1548
3. L. D. Carlos, Y. Messaddeq, H. F. Brito, R. A. Sá Ferreira, V. De Zea Bermudez, S. J. L. Ribeiro, *Adv. Mater.*, 2000, 12, 594-598
4. O. L. Malta, H. F. Brito, J. F. S. Menezes, F. R. Gonçalves e Silva, S. Alves Jr., F. S. Farias Jr., A. V. M. Andrade, *J. Lumin.*, 1997, 75, 255-268
5. O. L. Malta, M. A. Couto dos Santos, L. C. Thompson, N. K. Ito, *J. Lumin.*, 1996, 69, 77-84.
6. M. F. Hazenkamp, G. Blasse, *Chem. Mater.*, 1990, 2, 105-110.
7. R. M. Supkowski, W. D. Horrocks, *Inorg. Chim. Acta*, 2002, 340, 44-48.

**Table S1.** Selected bond lengths (Å) and angles (°) for **1-5**

|           | <b>1Eu</b> ·1.5CH <sub>3</sub> OH | <b>2Tb</b> ·0.5H <sub>2</sub> O·<br>CH <sub>3</sub> OH | <b>3Dy</b> ·H <sub>2</sub> O | <b>4Ho</b> ·0.5H <sub>2</sub> O·<br>CH <sub>3</sub> OH | <b>5Er</b> ·1.5H <sub>2</sub> O |
|-----------|-----------------------------------|--------------------------------------------------------|------------------------------|--------------------------------------------------------|---------------------------------|
| Ln1-O4    | 2.305(4)                          | 2.287(3)                                               | 2.277(6)                     | 2.266(3)                                               | 2.238(5)                        |
| Ln1-O3    | 2.360(4)                          | 2.330(3)                                               | 2.319(6)                     | 2.307(3)                                               | 2.288(5)                        |
| Ln1-O2    | 2.297(4)                          | 2.261(3)                                               | 2.260(6)                     | 2.260(3)                                               | 2.247(5)                        |
| Ln1-O1    | 2.313(4)                          | 2.283(3)                                               | 2.272(6)                     | 2.272(3)                                               | 2.260(5)                        |
| Ln1-N4    | 2.558(3)                          | 2.523(4)                                               | 2.527(8)                     | 2.518(4)                                               | 2.524(6)                        |
| Ln1-N3    | 2.554(3)                          | 2.516(4)                                               | 2.508(8)                     | 2.506(4)                                               | 2.470(6)                        |
| Ln1-N2    | 2.573(3)                          | 2.530(4)                                               | 2.522(7)                     | 2.524(4)                                               | 2.500(5)                        |
| Ln1-N1    | 2.554(3)                          | 2.515(4)                                               | 2.522(7)                     | 2.511(4)                                               | 2.478(6)                        |
| O4-Ln1-O3 | 151.69(10)                        | 150.53(12)                                             | 150.0(2)                     | 149.34(13)                                             | 148.66(19)                      |
| O2-Ln1-O1 | 151.13(10)                        | 149.73(12)                                             | 148.9(2)                     | 148.56(12)                                             | 148.29(17)                      |
| O1-Ln1-O3 | 101.97(13)                        | 102.21(13)                                             | 101.9(2)                     | 102.36(13)                                             | 102.82(19)                      |
| O2-Ln1-O4 | 97.81(13)                         | 98.65(13)                                              | 98.1(2)                      | 98.49(13)                                              | 98.79(19)                       |
| O2-Ln1-O3 | 87.72(13)                         | 87.61(13)                                              | 88.1(2)                      | 88.21(12)                                              | 87.82(18)                       |
| O1-Ln1-O4 | 86.50(13)                         | 86.80(14)                                              | 87.8(2)                      | 87.41(14)                                              | 87.5(2)                         |
| O4-Ln1-N1 | 80.97(11)                         | 80.49(13)                                              | 80.4(3)                      | 80.18(13)                                              | 79.74(19)                       |
| O1-Ln1-N3 | 80.46(12)                         | 79.78(13)                                              | 79.0(2)                      | 79.18(13)                                              | 79.09(18)                       |
| O2-Ln1-N4 | 80.92(12)                         | 79.86(13)                                              | 79.2(2)                      | 78.91(13)                                              | 79.02(18)                       |
| O3-Ln1-N2 | 79.70(12)                         | 79.00(12)                                              | 78.9(2)                      | 78.70(12)                                              | 78.20(18)                       |
| O2-Ln1-N3 | 77.29(12)                         | 76.62(12)                                              | 76.5(2)                      | 76.41(12)                                              | 76.19(17)                       |
| O3-Ln1-N1 | 76.60(12)                         | 76.06(12)                                              | 76.0(2)                      | 75.62(12)                                              | 75.66(17)                       |
| O4-Ln1-N2 | 75.97(12)                         | 75.83(13)                                              | 75.3(2)                      | 75.12(13)                                              | 74.85(19)                       |
| O1-Ln1-N4 | 73.54(12)                         | 73.76(13)                                              | 73.8(3)                      | 73.68(13)                                              | 73.54(19)                       |
| O2-Ln1-N2 | 71.17(11)                         | 71.61(12)                                              | 71.9(2)                      | 71.98(12)                                              | 72.22(17)                       |
| O1-Ln1-N1 | 70.80(11)                         | 71.59(13)                                              | 71.8(2)                      | 71.78(13)                                              | 72.08(18)                       |
| O4-Ln1-N4 | 70.90(11)                         | 71.23(13)                                              | 71.5(3)                      | 71.77(14)                                              | 71.7(2)                         |
| O3-Ln1-N3 | 70.47(10)                         | 70.65(13)                                              | 71.0(2)                      | 71.17(12)                                              | 71.40(18)                       |
| O2-Ln1-N1 | 138.06(11)                        | 138.63(12)                                             | 139.3(2)                     | 139.61(13)                                             | 139.58(18)                      |
| O4-Ln1-N3 | 137.84(10)                        | 138.81(13)                                             | 139.0(3)                     | 139.49(14)                                             | 139.9(2)                        |
| O1-Ln1-N2 | 137.02(11)                        | 138.08(12)                                             | 138.7(2)                     | 138.83(13)                                             | 138.89(18)                      |

**Table S2.** The CSM and  $\Delta$  values for complexes **1 – 5**.

| CSM and $\Delta$                 | <b>1Eu</b> ·1.5CH <sub>3</sub> OH | <b>2Tb</b> ·0.5H <sub>2</sub> O·<br>CH <sub>3</sub> OH | <b>3Dy</b> ·H <sub>2</sub> O | <b>4Ho</b> ·0.5H <sub>2</sub> O·<br>CH <sub>3</sub> OH | <b>5Er</b> ·1.5H <sub>2</sub> O |
|----------------------------------|-----------------------------------|--------------------------------------------------------|------------------------------|--------------------------------------------------------|---------------------------------|
| <b>square antiprism</b> $D_{4d}$ | 2.41022                           | 2.20235                                                | 2.22767                      | 2.13430                                                | 2.07817                         |
| <b>dodecahedron</b> $D_{2d}$     | 1.26125                           | 1.11645                                                | 1.04025                      | 1.01486                                                | 0.98597                         |
| $\Delta$                         | 0.58295                           | 0.50269                                                | 0.48601                      | 0.45973                                                | 0.43965                         |

**Table S3.** Hydrogen bonds of **1Eu**·1.5CH<sub>3</sub>OH

| D-H...A          | <i>d</i> (D-H) / Å | <i>d</i> (H-A) / Å | <i>d</i> (D-A) / Å | ∠ (D-H-A) / ° |
|------------------|--------------------|--------------------|--------------------|---------------|
| N9-H9C...O13     | 0.90               | 1.86               | 2.729(6)           | 162           |
| O13-H13B...O3    | 0.84               | 2.03               | 2.830(6)           | 159           |
| C8-H8B...O10     | 0.99               | 2.45               | 3.428(7)           | 171           |
| C9-H9B...O11     | 0.99               | 2.54               | 3.481(7)           | 159           |
| C24-H24B...O5    | 0.99               | 2.38               | 3.310(8)           | 157           |
| C19-H19A...O14i  | 0.95               | 2.33               | 3.265(13)          | 169           |
| C29-H29A...O8ii  | 0.95               | 2.53               | 3.467(8)           | 171           |
| C21-H21A...O7iii | 0.95               | 2.59               | 3.414(5)           | 145           |
| C23-H23A...O7iii | 0.95               | 2.60               | 3.458(5)           | 150           |
| C7-H7A...O12iv   | 0.95               | 2.66               | 3.461(9)           | 142           |

Symmetry codes: i: 1-x, 1-y, -z; ii: -x, 2-y, 1-z; iii: 1-x, 1-y, 1-z; iv: -x, 2-y, -z.

**Table S4.** Hydrogen bonds of **2Tb**·0.5H<sub>2</sub>O·CH<sub>3</sub>OH

| D-H...A        | <i>d</i> (D-H) / Å | <i>d</i> (H-A) / Å | <i>d</i> (D-A) / Å | ∠ (D-H-A) / ° |
|----------------|--------------------|--------------------|--------------------|---------------|
| C8-H8B...O9'   | 0.97               | 2.33               | 3.318 (3)          | 146           |
| C10-H10...O9'i | 0.93               | 2.50               | 3.340 (2)          | 165           |
| C8-H8B...O10   | 0.97               | 2.46               | 3.426(8)           | 173           |
| C9-H9B...O11   | 0.97               | 2.55               | 3.478(10)          | 159           |
| C9-H9B...O11'  | 0.93               | 2.51               | 3.340 (2)          | 153           |
| C24-H24B...O5  | 0.97               | 2.36               | 3.299(11)          | 162           |
| N9-H9C...O13   | 0.91               | 1.87               | 2.747(7)           | 160           |
| O13-H13A...O3  | 0.82               | 2.08               | 2.870(7)           | 161           |

Symmetry code: i: 1-x, 2-y, -z. O9' occupancy 0.135(7); O11' occupancy 0.232(7)

**Table S5.** Hydrogen bonds of **3Dy**·H<sub>2</sub>O

| D-H...A          | <i>d</i> (D-H) / Å | <i>d</i> (H-A) / Å | <i>d</i> (D-A) / Å | ∠ (D-H-A) / ° |
|------------------|--------------------|--------------------|--------------------|---------------|
| C8-H8B...O9'     | 0.97               | 2.50               | 3.332(57)          | 144           |
| C10-H10...O9'i   | 0.93               | 2.40               | 3.31(4)            | 166           |
| C8-H8B...O10     | 0.97               | 2.42               | 3.392(17)          | 175           |
| C9-H9B...O11     | 0.97               | 2.53               | 3.45(2)            | 158           |
| C9-H9B...O11'    | 0.97               | 2.56               | 3.46(4)            | 153           |
| C24-H24B...O5    | 0.97               | 2.34               | 3.28(2)            | 162           |
| N9-H9C...O1W     | 0.91               | 1.86               | 2.734(18)          | 157           |
| C24-H24B...O6'ii | 0.97               | 2.49               | 3.08(3)            | 119           |
| C21-H21...O7iii  | 0.93               | 2.67               | 3.49(1)            | 148           |
| C23-H23...O7iii  | 0.93               | 2.71               | 3.56(1)            | 152           |
| C29-H29...O8iv   | 0.93               | 2.57               | 3.492(18)          | 170           |

Symmetry codes: i: 1-x, 2-y, -z; ii: -x, 1-y, 1-z; iii: 1-x, 1-y, 1-z; iv: -x, 2-y, -z;. O9' occupancy 0.137(12); O11' occupancy 0.265(14); O6' occupancy 0.398(17).

**Table S6.** Hydrogen bonds of **4Ho**·0.5H<sub>2</sub>O·CH<sub>3</sub>OH

| D-H...A        | <i>d</i> (D-H) / Å | <i>d</i> (H-A) / Å | <i>d</i> (D-A) / Å | ∠ (D-H-A) / ° |
|----------------|--------------------|--------------------|--------------------|---------------|
| C8-H8B...O9'   | 0.97               | 2.38               | 3.32(3)            | 144           |
| C10-H10...O9'i | 0.93               | 2.44               | 3.35(2)            | 166           |
| C8-H8B...O10   | 0.97               | 2.42               | 3.390(10)          | 174           |
| C9-H9B...O11   | 0.97               | 2.54               | 3.459(10)          | 159           |
| C9-H9B...O11'  | 0.97               | 2.51               | 3.40(2)            | 152           |
| C24-H24B...O5  | 0.97               | 2.35               | 3.292(12)          | 164           |
| N9-H9C...O13   | 0.91               | 1.91               | 2.777(8)           | 158           |
| O13-H13A...O3  | 0.82               | 2.12               | 2.904(8)           | 161           |

Symmetry code: i: 1-x, 2-y, -z. O9' occupancy 0.151(8); O11' occupancy 0.230(7)

**Table S7.** Hydrogen bonds of **5Er**·1.5H<sub>2</sub>O

| D-H...A        | <i>d</i> (D-H) / Å | <i>d</i> (H-A) / Å | <i>d</i> (D-A) / Å | ∠ (D-H-A) / ° |
|----------------|--------------------|--------------------|--------------------|---------------|
| C8-H8B...O9'   | 0.97               | 2.49               | 3.32(4)            | 143           |
| C10-H10...O9'i | 0.93               | 2.31               | 3.22(2)            | 166           |
| C8-H8B...O10   | 0.97               | 2.41               | 3.374(13)          | 174           |
| C9-H9B...O11   | 0.97               | 2.49               | 3.413(16)          | 159           |
| C9-H9B...O11'  | 0.97               | 2.54               | 3.43(3)            | 152           |
| C24-H24B...O5  | 0.97               | 2.32               | 3.261(17)          | 163           |
| N9-H9C...O1W   | 0.91               | 1.88               | 2.734(13)          | 156           |

Symmetry code: i: 1-x, 2-y, -z. O9' occupancy 0.150(9); O11' occupancy 0.243(11)

**Table S8.** The parameters obtained by fitting the *ac* magnetic susceptibilities of compound **3Dy**·H<sub>2</sub>O at 2.0 K in indicated *dc* fields.

| <i>H</i> / kOe | $\chi_T / \text{cm}^3 \cdot \text{mol}^{-1}$ | $\chi_S / \text{cm}^3 \cdot \text{mol}^{-1}$ | $\ln(\tau / \text{s})$ | $\alpha$ | $R^a$                |
|----------------|----------------------------------------------|----------------------------------------------|------------------------|----------|----------------------|
| 0              | 5.65                                         | 0.00                                         | -11.16                 | 0.01     | $7.0 \times 10^{-6}$ |
| 0.5            | 5.59                                         | 1.39                                         | -6.86                  | 0.34     | $1.4 \times 10^{-4}$ |
| 1.0            | 5.27                                         | 0.43                                         | -4.99                  | 0.46     | $2.8 \times 10^{-4}$ |
| 1.5            | 4.84                                         | 0.25                                         | -3.98                  | 0.51     | $3.8 \times 10^{-4}$ |
| 2.0            | 4.12                                         | 0.20                                         | -3.58                  | 0.52     | $8.8 \times 10^{-4}$ |
| 2.5            | 3.60                                         | 0.18                                         | -3.32                  | 0.53     | $1.8 \times 10^{-3}$ |
| 3.0            | 2.75                                         | 0.22                                         | -3.58                  | 0.48     | $2.8 \times 10^{-4}$ |

$$^a R = \frac{\sum [(\chi'_{obs} - \chi'_{cal})^2 + (\chi''_{obs} - \chi''_{cal})^2]}{\sum [\chi'^2_{obs} + \chi''^2_{obs}]}$$

**Table S9.** The parameters obtained by fitting the *ac* magnetic susceptibilities of compound **3Dy**·H<sub>2</sub>O under 1.5 kOe *dc* field.

| <i>T</i> / K | $\chi_T / \text{cm}^3 \cdot \text{mol}^{-1}$ | $\chi_S / \text{cm}^3 \cdot \text{mol}^{-1}$ | $\ln(\tau / \text{s})$ | $\alpha$ | $R^a$                |
|--------------|----------------------------------------------|----------------------------------------------|------------------------|----------|----------------------|
| 1.8          | 6.75                                         | 0.24                                         | -3.83                  | 0.54     | $2.9 \times 10^{-5}$ |
| 2            | 6.44                                         | 0.27                                         | -3.74                  | 0.54     | $3.7 \times 10^{-5}$ |
| 3            | 4.66                                         | 0.43                                         | -3.99                  | 0.48     | $1.7 \times 10^{-4}$ |
| 4            | 3.46                                         | 0.52                                         | -4.64                  | 0.39     | $3.8 \times 10^{-4}$ |
| 5            | 2.73                                         | 0.54                                         | -5.39                  | 0.30     | $4.5 \times 10^{-4}$ |
| 6            | 2.26                                         | 0.54                                         | -6.14                  | 0.24     | $3.2 \times 10^{-4}$ |
| 7            | 1.94                                         | 0.54                                         | -6.82                  | 0.21     | $2.4 \times 10^{-4}$ |
| 8            | 1.70                                         | 0.56                                         | -7.45                  | 0.20     | $1.6 \times 10^{-4}$ |
| 9            | 1.51                                         | 0.60                                         | -8.01                  | 0.19     | $1.1 \times 10^{-4}$ |
| 10           | 1.36                                         | 0.64                                         | -8.53                  | 0.19     | $6.6 \times 10^{-5}$ |

$$^a R = \frac{\sum [(\chi'_{obs} - \chi'_{cal})^2 + (\chi''_{obs} - \chi''_{cal})^2]}{\sum [\chi'^2_{obs} + \chi''^2_{obs}]}$$

**Table S10.** The parameters obtained by fitting the *ac* magnetic susceptibilities of compound **5Er**·1.5H<sub>2</sub>O under 1.5 kOe *dc* field.

| <i>T</i> / K | $\chi_T / \text{cm}^3 \cdot \text{mol}^{-1}$ | $\chi_S / \text{cm}^3 \cdot \text{mol}^{-1}$ | $\ln(\tau / \text{s})$ | $\alpha$ | $R$                  |
|--------------|----------------------------------------------|----------------------------------------------|------------------------|----------|----------------------|
| 1.8          | 2.38                                         | 0.60                                         | -8.73                  | 0.21     | $1.1 \times 10^{-4}$ |
| 1.9          | 2.31                                         | 0.02                                         | -9.32                  | 0.26     | $5.7 \times 10^{-5}$ |
| 2            | 2.23                                         | 0.05                                         | -9.40                  | 0.24     | $4.5 \times 10^{-5}$ |
| 2.1          | 2.16                                         | 0.08                                         | -9.47                  | 0.23     | $2.4 \times 10^{-5}$ |
| 2.2          | 2.09                                         | 0.27                                         | -9.39                  | 0.20     | $3.4 \times 10^{-5}$ |
| 2.3          | 2.02                                         | 0.08                                         | -9.67                  | 0.22     | $3.1 \times 10^{-5}$ |
| 2.4          | 1.96                                         | 0.19                                         | -9.68                  | 0.20     | $2.5 \times 10^{-5}$ |
| 2.6          | 1.84                                         | 0.03                                         | -10.04                 | 0.18     | $1.6 \times 10^{-5}$ |
| 2.8          | 1.74                                         | 0.03                                         | -10.25                 | 0.16     | $1.8 \times 10^{-5}$ |
| 3.0          | 1.64                                         | 0.03                                         | -10.48                 | 0.13     | $2.3 \times 10^{-5}$ |

**Table S11.** The parameters obtained by fitting the *ac* magnetic susceptibilities of compound **6Yb** in indicated *dc* field at 2 K.

| <i>H</i> / kOe | $\chi_T / \text{cm}^3 \cdot \text{mol}^{-1}$ | $\chi_S / \text{cm}^3 \cdot \text{mol}^{-1}$ | $\ln(\tau / \text{s})$ | $\alpha$ | $R$                  |
|----------------|----------------------------------------------|----------------------------------------------|------------------------|----------|----------------------|
| 0.5            | 0.40                                         | 0.20                                         | -8.57                  | 0.07     | $1.2 \times 10^{-5}$ |
| 1.0            | 0.40                                         | 0.14                                         | -8.63                  | 0.08     | $2.9 \times 10^{-5}$ |
| 1.5            | 0.39                                         | 0.12                                         | -8.64                  | 0.09     | $6.3 \times 10^{-5}$ |
| 2.0            | 0.39                                         | 0.10                                         | -8.68                  | 0.11     | $3.3 \times 10^{-5}$ |
| 2.5            | 0.38                                         | 0.09                                         | -8.69                  | 0.13     | $1.4 \times 10^{-4}$ |
| 3.0            | 0.37                                         | 0.08                                         | -8.75                  | 0.18     | $1.3 \times 10^{-3}$ |

**Table S12.** The parameters obtained by fitting the *ac* magnetic susceptibilities of compound **6Yb** under 1.5 kOe *dc* field.

| T / K | $\chi_T / \text{cm}^3 \cdot \text{mol}^{-1}$ | $\chi_S / \text{cm}^3 \cdot \text{mol}^{-1}$ | $\ln(\tau / \text{s})$ | $\alpha$ | $R$                  |
|-------|----------------------------------------------|----------------------------------------------|------------------------|----------|----------------------|
| 2.0   | 0.39                                         | 0.12                                         | -8.64                  | 0.09     | $6.3 \times 10^{-5}$ |
| 2.2   | 0.36                                         | 0.14                                         | -8.95                  | 0.07     | $5.2 \times 10^{-5}$ |
| 2.4   | 0.33                                         | 0.15                                         | -9.26                  | 0.08     | $5.2 \times 10^{-5}$ |
| 2.6   | 0.31                                         | 0.16                                         | -9.60                  | 0.09     | $6.3 \times 10^{-5}$ |
| 2.8   | 0.28                                         | 0.19                                         | -9.65                  | 0.06     | $3.1 \times 10^{-5}$ |

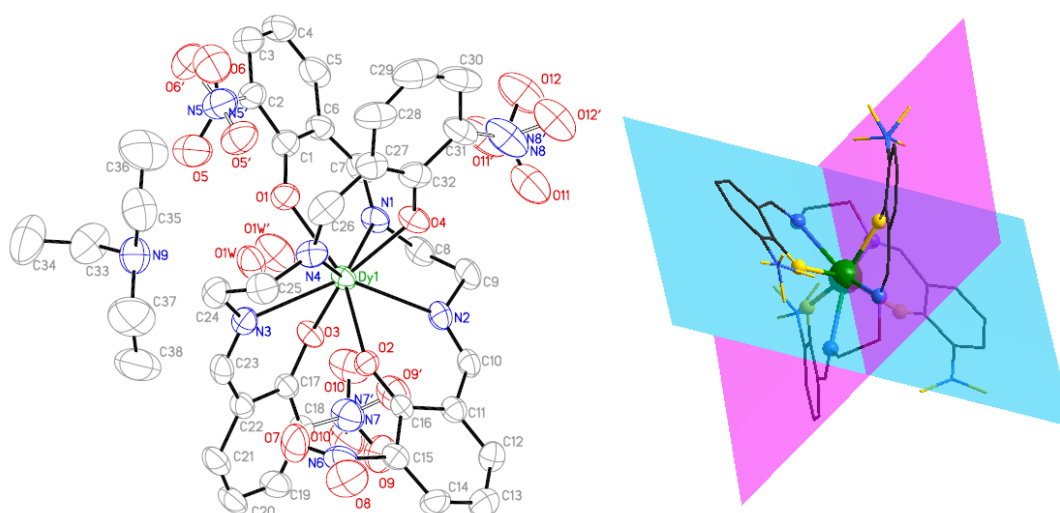

**Figure S1.** Left: The molecular structure of  $3\text{Dy} \cdot \text{H}_2\text{O}$  (50% probability); Right: The mononuclear structure of  $[\text{Dy}(\text{3-NO}_2\text{salen})_2]$  with two perpendicular ligands.

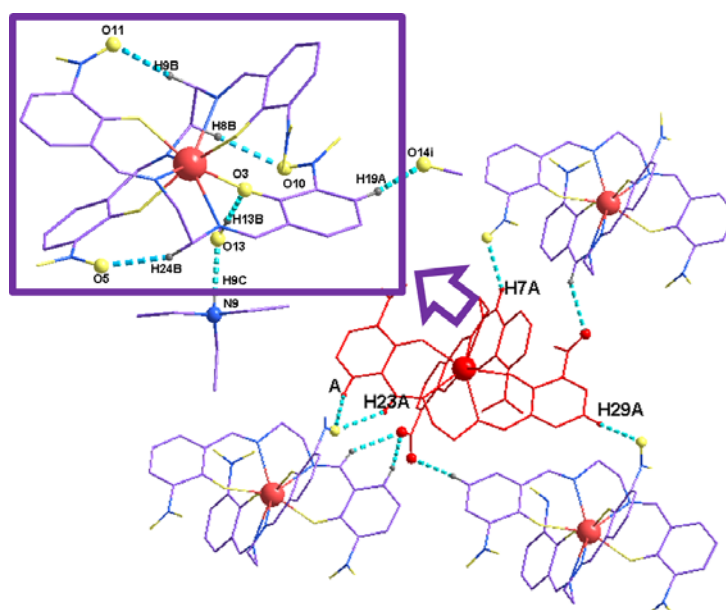

**Figure S2.** The intra- and inter hydrogen bond interactions in structure  $1\text{Eu} \cdot 1.5\text{CH}_3\text{OH}$ . H atoms are omitted for clarity except for those involved in hydrogen bonds. Symmetry code: i: 1-x, 1-y, -z



JEu2 #4 RT: 0.06 AV: 1 NL: 4.07E2  
T: ITMS - p ESI Full ms [100.00-2000.00]

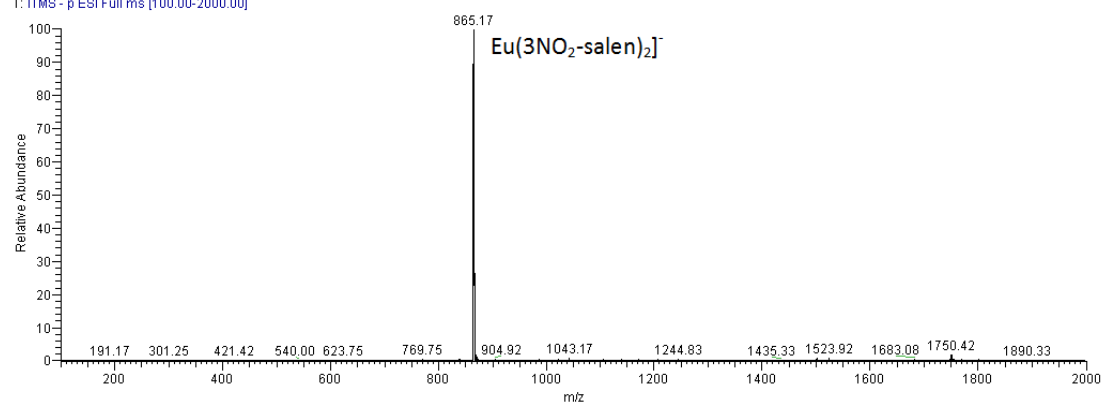

**Figure S3.** Negative ion electrospray ionization mass spectrum of **1Eu**

Tb\_130514151236 #4-10 RT: 0.05-0.15 AV: 7 NL: 3.15E3  
T: ITMS - p ESI Full ms [200.00-2000.00]

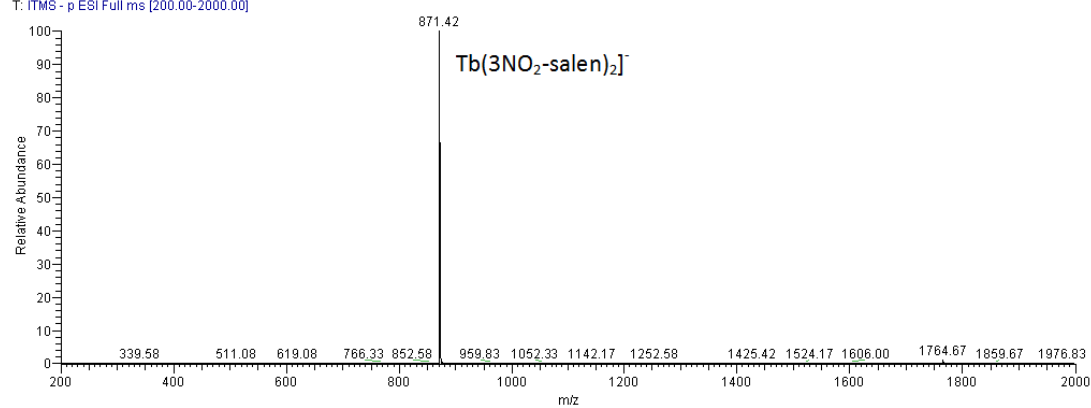

**Figure S4.** Negative ion electrospray ionization mass spectrum of **2Tb**

Dy\_130514151049 #4-9 RT: 0.05-0.13 AV: 6 NL: 9.46E2  
T: ITMS - p ESI Full ms [200.00-2000.00]

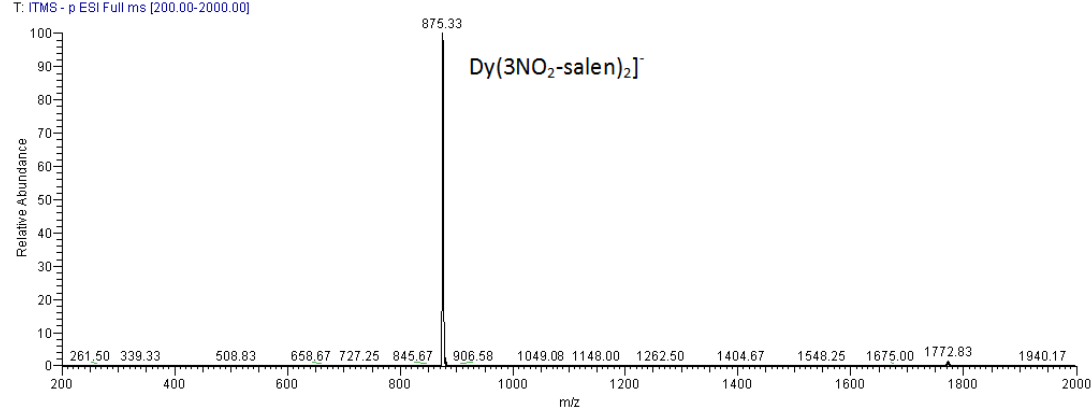

**Figure S5.** Negative ion electrospray ionization mass spectrum of **3Dy**

Ho\_130514151424 #4-9 RT: 0.05-0.13 AV: 6 NL: 5.63E3  
T: ITMS - p ESI Full ms [200.00-2000.00]

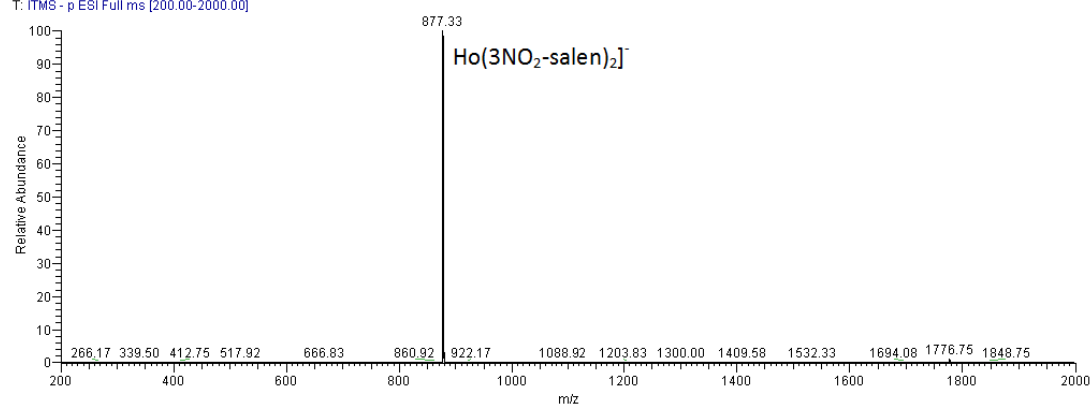

**Figure S6.** Negative ion electrospray ionization mass spectrum of **4Ho**

Er\_130514151620 #4-10 RT: 0.05-0.14 AV: 7 NL: 1.96E3  
T: ITMS - p ESI Full ms [200.00-2000.00]

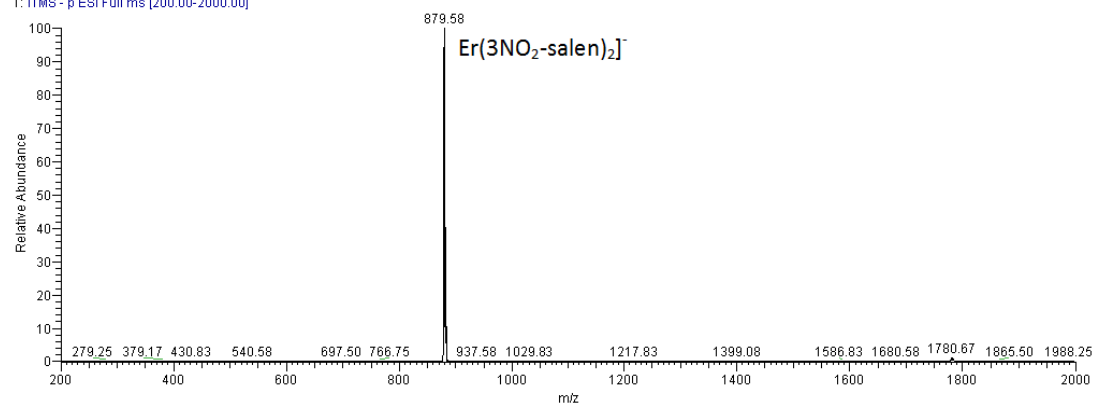

**Figure S7.** Negative ion electrospray ionization mass spectrum of **5Er**

Yb2 #3-7 RT: 0.04-0.11 AV: 5 NL: 1.70E2  
T: ITMS - p ESI Full ms [100.00-2000.00]

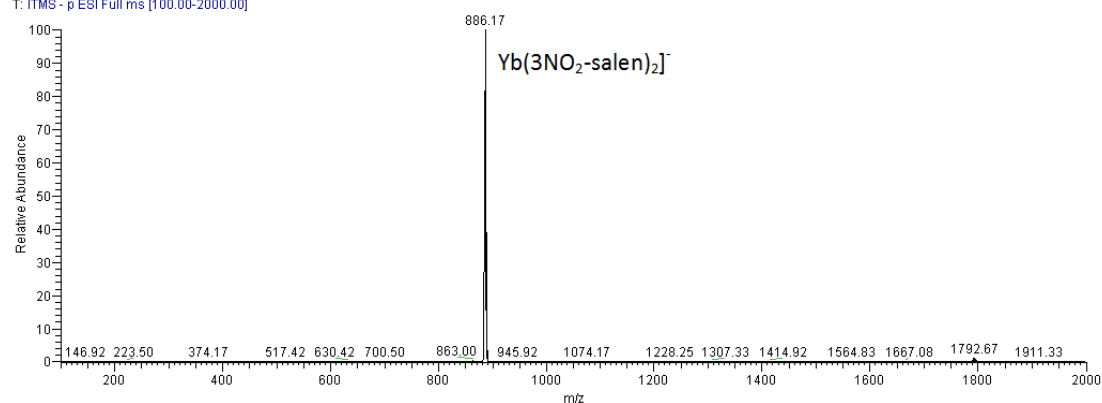

**Figure S8.** Negative ion electrospray ionization mass spectrum of **6Yb**

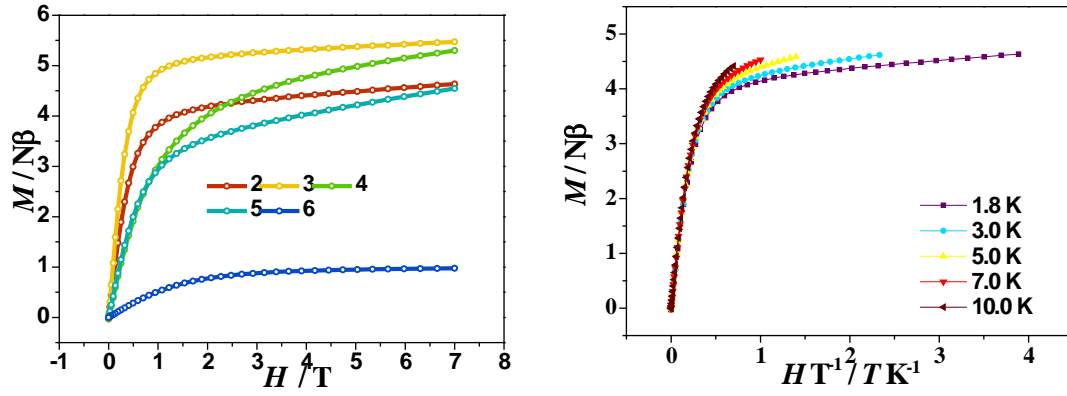

**Figure S9.** The  $M$  vs.  $H$  plots at 1.8 K for 2 -6 (left) and the  $M$  vs.  $H/T$  plots of  $2\text{Tb}\cdot 0.5\text{H}_2\text{O}\cdot \text{CH}_3\text{OH}$  (right) at indicated temperatures.

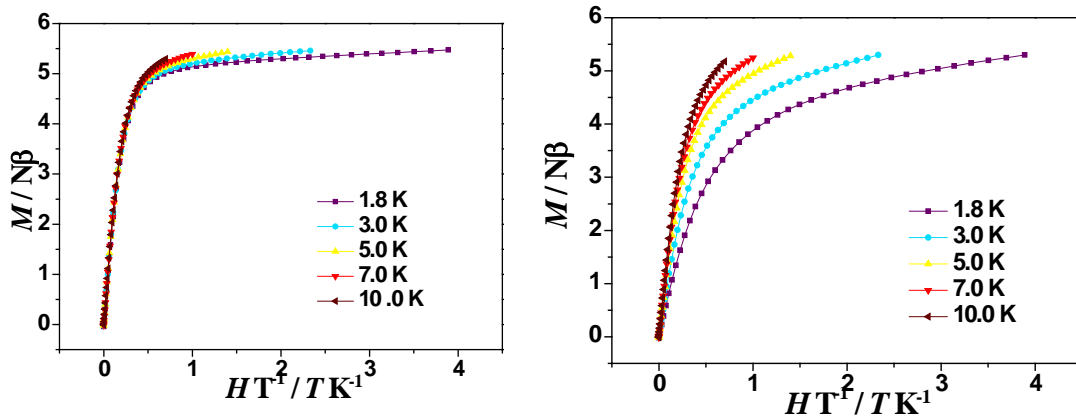

**Figure S10.** The  $M$  vs.  $H/T$  plots of  $3\text{Dy}\cdot \text{H}_2\text{O}$  (left) and  $4\text{Ho}\cdot 0.5\text{H}_2\text{O}\cdot \text{CH}_3\text{OH}$  (right) at indicated temperatures.

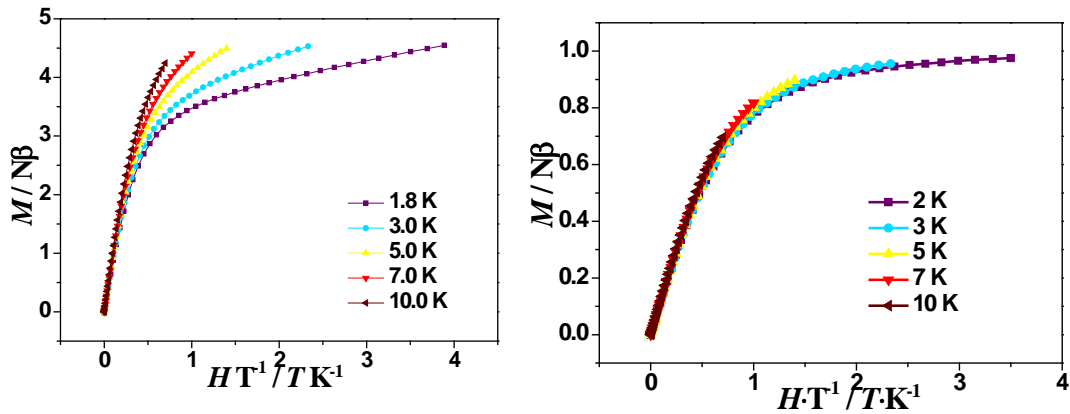

**Figure S11.** The  $M$  vs.  $H/T$  plots of  $5\text{Er}\cdot 1.5\text{H}_2\text{O}$  (left) and  $6\text{Yb}$  (right) at indicated temperatures.

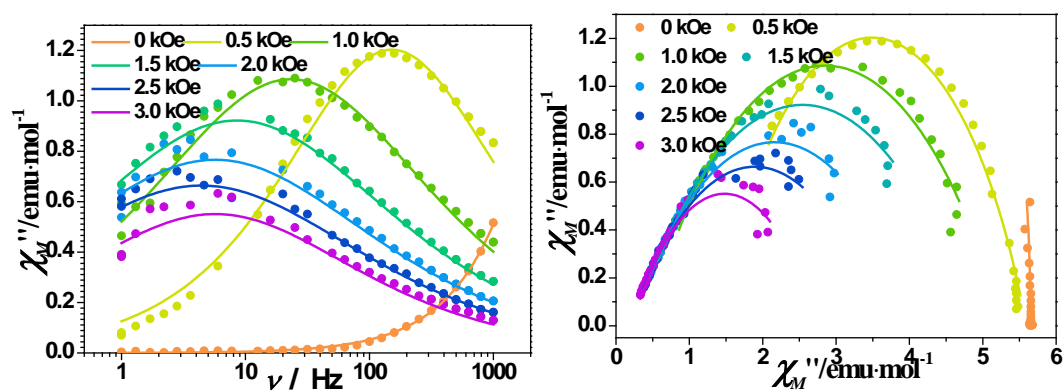

**Figure S12.** Variable-frequency out-of-phase ac susceptibility data (left) and Cole-Cole plots of  $3\text{Dy}\cdot\text{H}_2\text{O}$  at 2 K under indicated external dc fields. The solid lines represent the best fits according to Debye model.

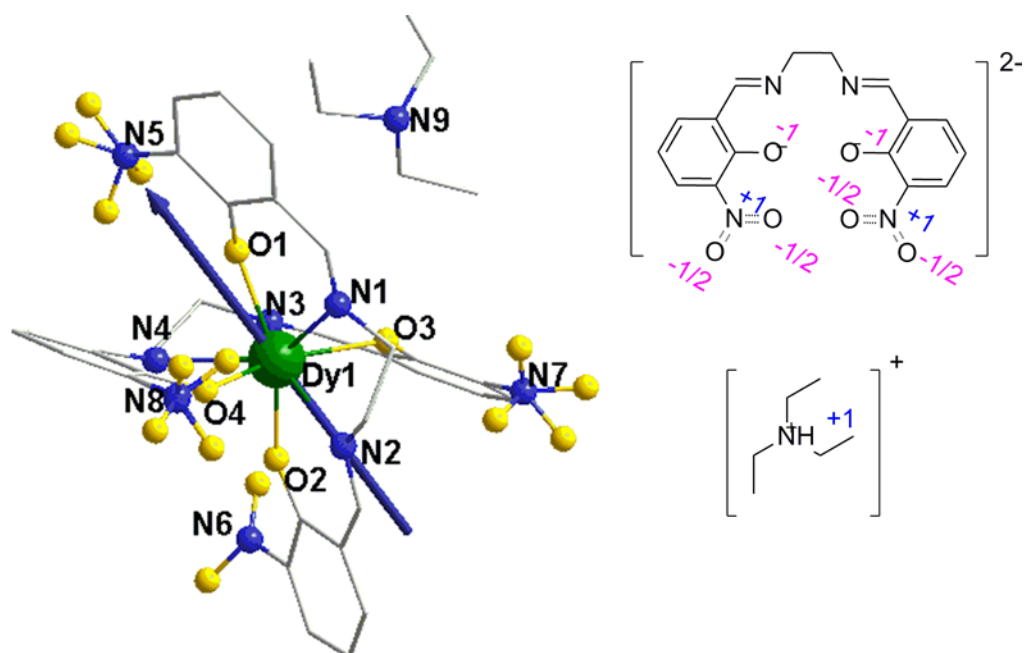

**Figure S13.** The orientation of the magnetic anisotropy is estimated by using MAGELLAN software. The mononuclear  $[\text{Dy}(\text{3-NO}_2\text{salen})_2]$  and  $(\text{Et}_3\text{N})^+$  counterion are considered in the calculation. Left: The calculated easy-axis (blue arrow) in  $3\text{Dy}\cdot\text{H}_2\text{O}$ . Right: The partial charges of the  $3\text{-NO}_2\text{salen}^{2-}$  ligand and  $(\text{Et}_3\text{N})^+$ . The direction of the arrow head is arbitrary.

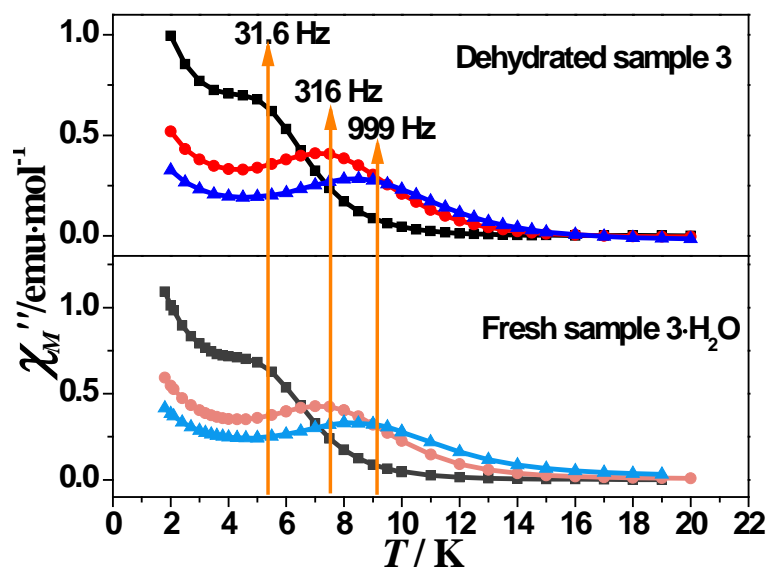

**Figure S14.** Variable-temperature out-of-phase ac susceptibility data of fresh sample  $3\text{Dy}\cdot\text{H}_2\text{O}$  and dehydrated sample of  $3\text{Dy}$  from 2 to 20 K at indicated frequencies.

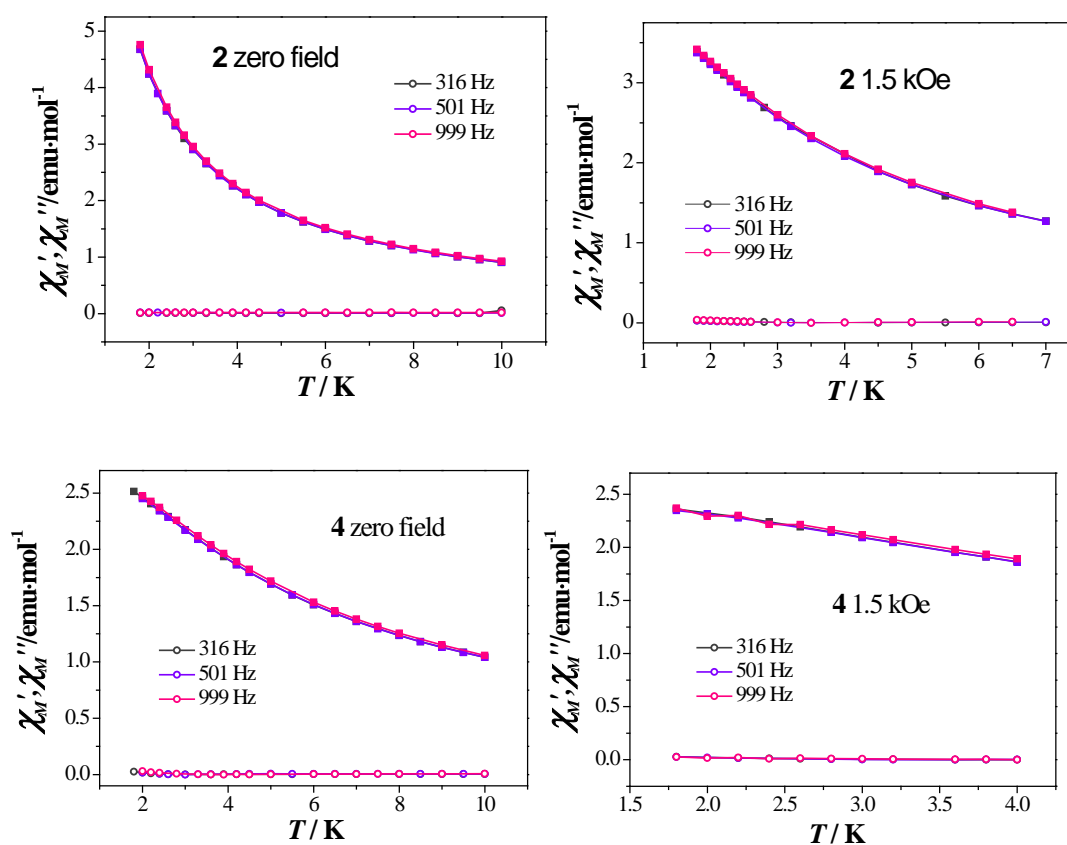

**Figure S15.** Variable-temperature ac susceptibility data of  $2\text{Tb}\cdot 0.5\text{H}_2\text{O}\cdot\text{CH}_3\text{OH}$  (up) and  $4\text{Ho}\cdot 0.5\text{H}_2\text{O}\cdot\text{CH}_3\text{OH}$  (down) in zero static field (left) and 1.5 kOe dc field (right). The square represents the in-phase ac magnetic susceptibility, and the circle represents out-of-phase ac magnetic susceptibility.

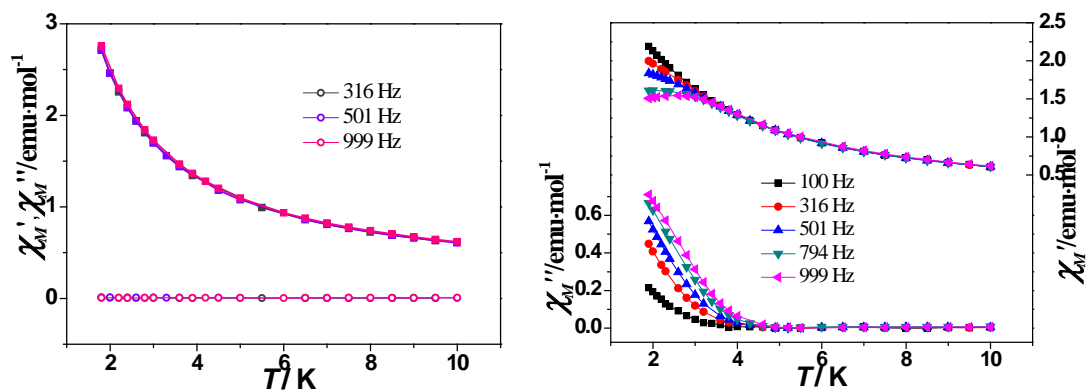

**Figure S16.** Variable-temperature ac susceptibility data of  $5\text{Er}\cdot 1.5\text{H}_2\text{O}$  in zero static field (left) and 1.5 kOe dc field (right).

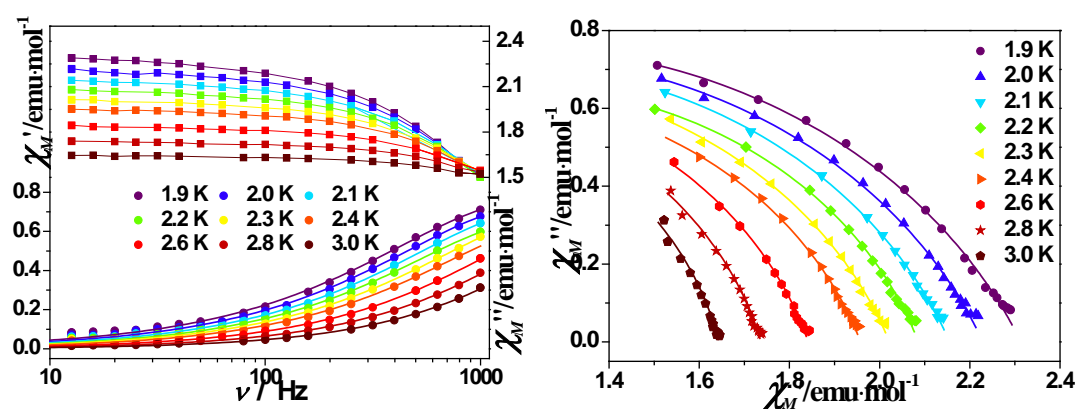

**Figure S17.** Variable- frequency ac susceptibility data (left) and Cole-Cole plots (right) of  $5\text{Er}\cdot 1.5\text{H}_2\text{O}$  in 1.5 kOe dc field. The solid line represents the best fits according to Arrhenius law.

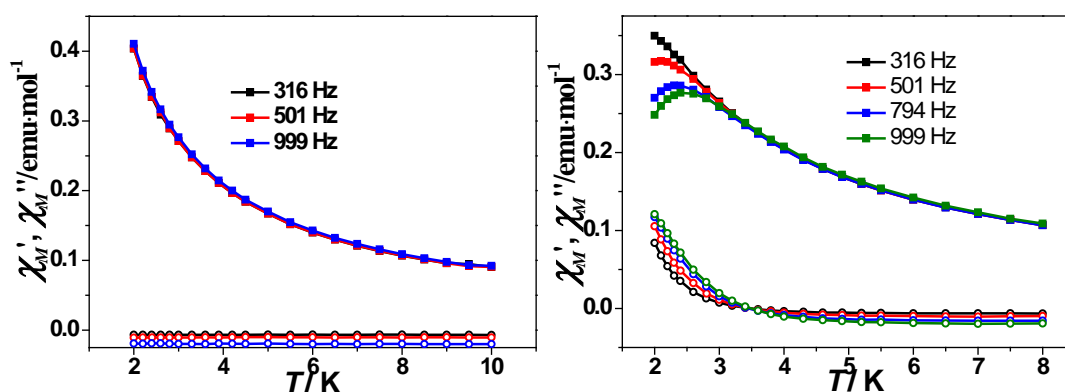

**Figure S18.** Variable-temperature ac susceptibility data of  $6\text{Yb}$  in zero static field (left) and 1.5 kOe dc field (right).

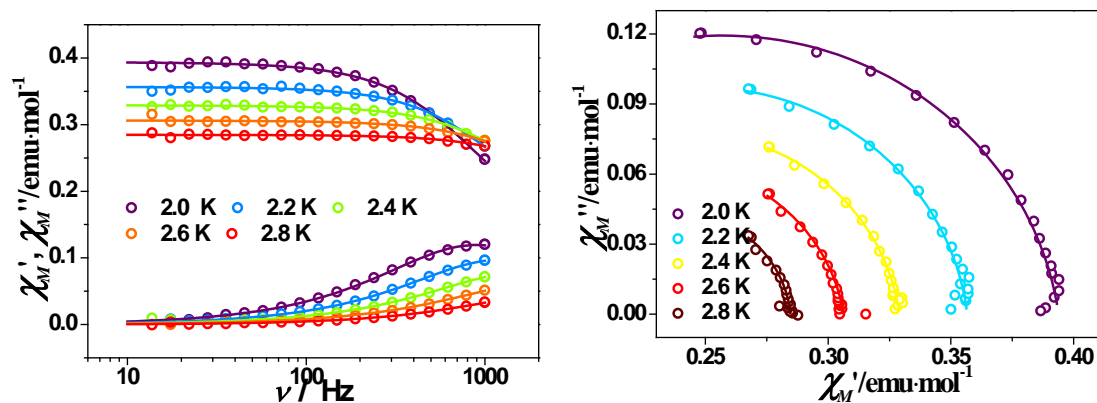

**Figure S19.** Variable- frequency ac susceptibility data (left) and Cole-Cole plots (right) of **6Yb** in 1.5 kOe dc field. The solid line represents the best fits according to Arrhenius law.

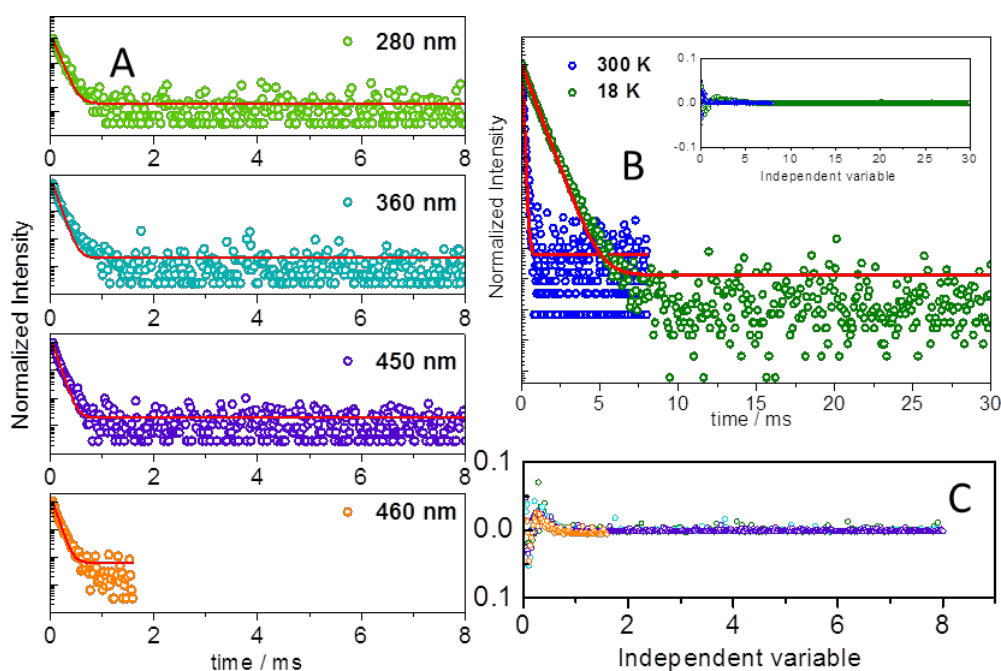

**Figure S20.** Emission decay curves of **1Eu** (A) excited at 280 nm, 360nm, 450 nm and 460 nm and monitored at 612 nm and (B) excited at 460 nm and acquired at 18 K and 300 K. The solid lines represented the best fit using a single exponential function ( $R > 0.994$ ). The fit residual plots are also shown at the bottom (C).

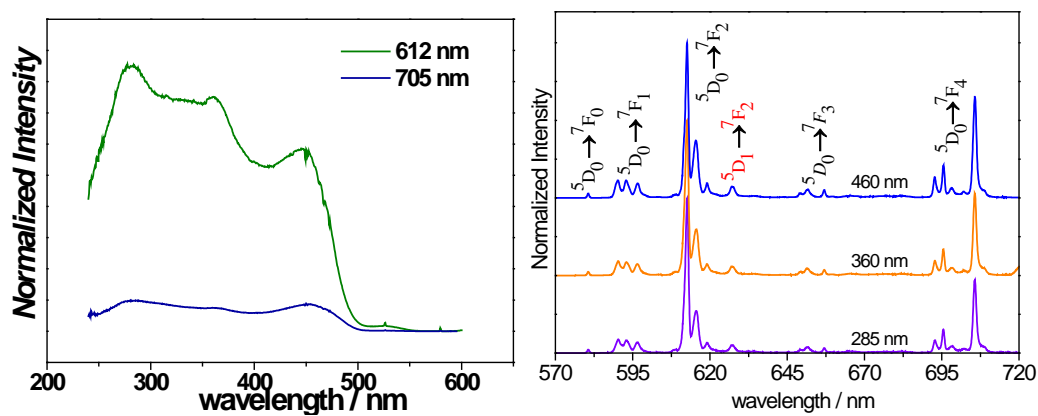

**Figure S21.** The excitation (left) and emission (right) spectra of **1Eu** recorded at 14 K.

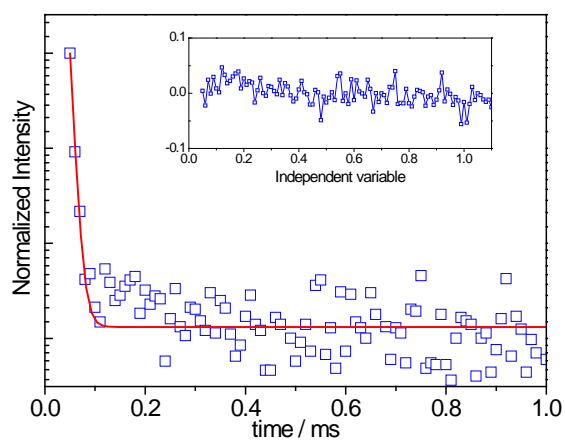

**Figure S22.** Room temperature emission decay curves of **6Yb** excited at 460 nm and monitored at 995 nm. The solid line represents the best fit using a single exponential function ( $R > 0.98$ ). The fit residual plot is also shown (inset).
